## CORRECTION

# Correction: Associations between continuity of primary and specialty physician care and use of hospital-based care among community-dwelling older adults with complex care needs

Aaron Jones, Susan E. Bronskill, Hsien Seow, Mats Junek, David Feeny, Andrew P. Costa

The hazard ratio label on the first line of [Fig 2](#) is incorrect. The ratio should read “0.90 (0.89–0.92)”. The authors have included a corrected version below.

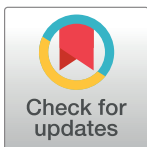

## OPEN ACCESS

**Citation:** Jones A, Bronskill SE, Seow H, Junek M, Feeny D, Costa AP (2021) Correction: Associations between continuity of primary and specialty physician care and use of hospital-based care among community-dwelling older adults with complex care needs. PLoS ONE 16(10): e0258708. <https://doi.org/10.1371/journal.pone.0258708>

**Published:** October 12, 2021

**Copyright:** © 2021 Jones et al. This is an open access article distributed under the terms of the [Creative Commons Attribution License](#), which permits unrestricted use, distribution, and reproduction in any medium, provided the original author and source are credited.

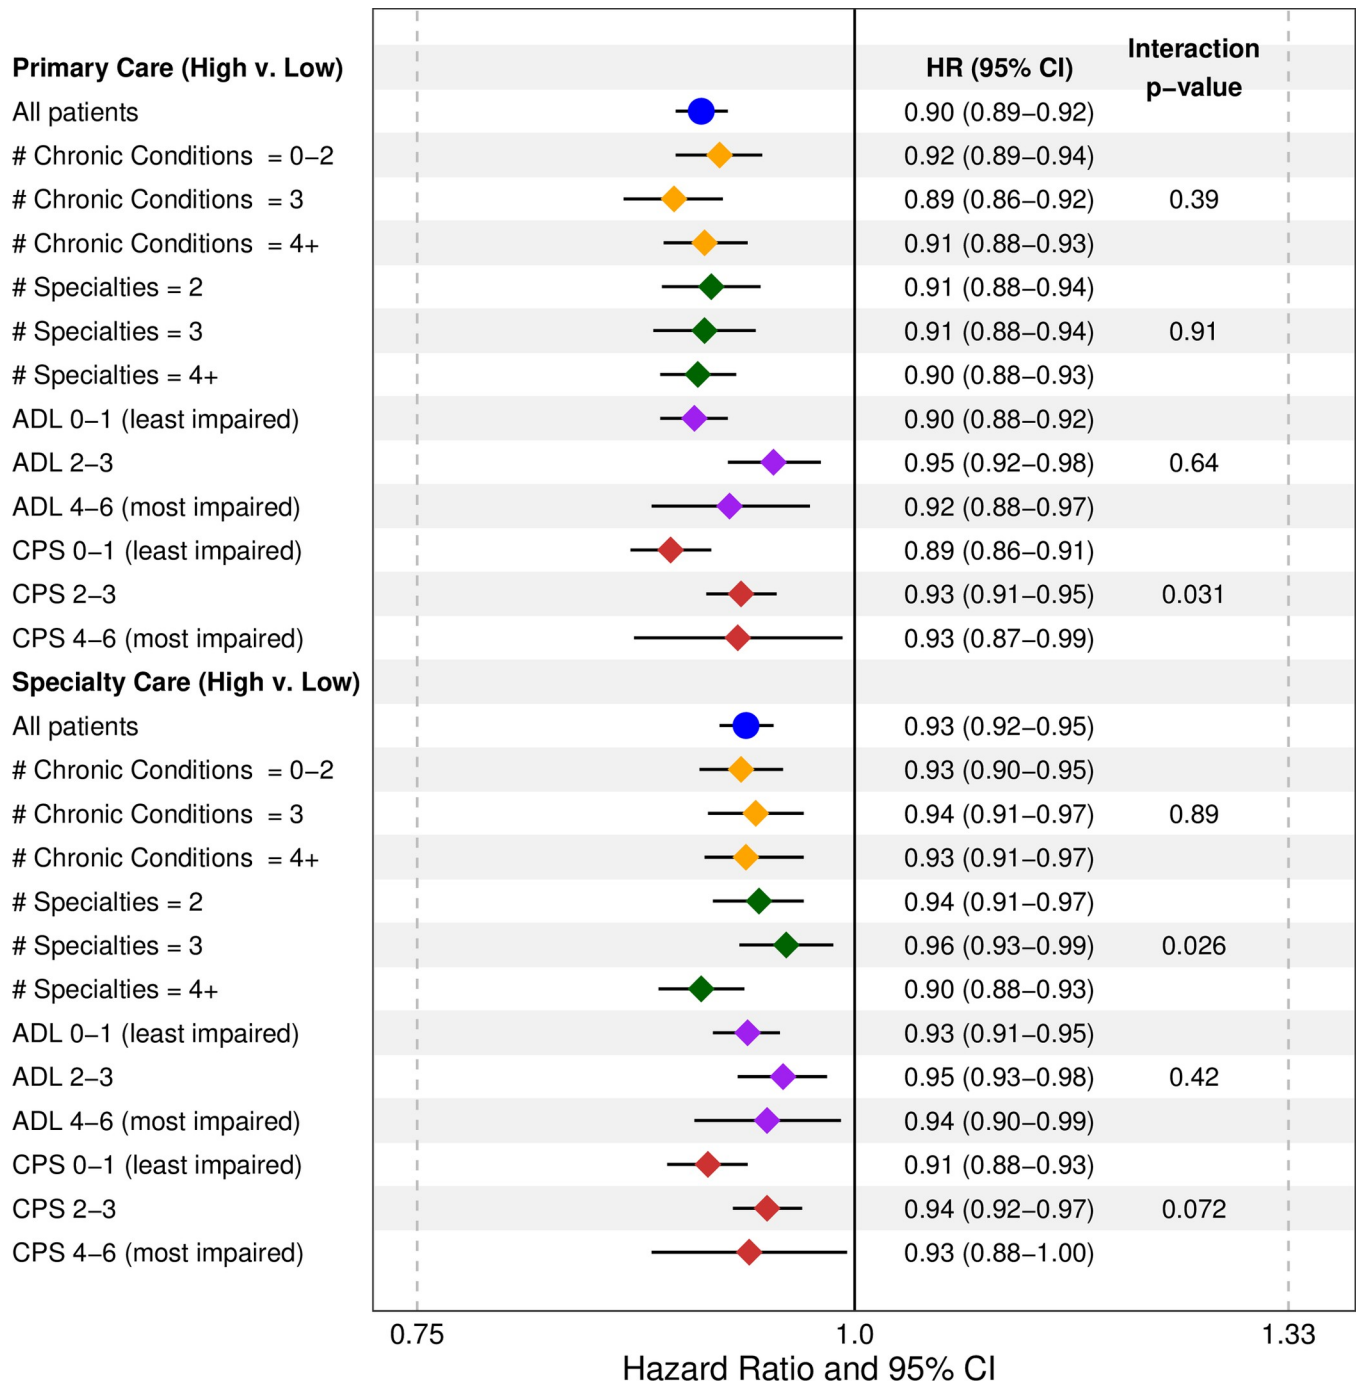

Fig 2. Associations between continuity of care and risk of an emergency department visit across effect modifiers.

<https://doi.org/10.1371/journal.pone.0258708.g001>

**Reference**

1. Jones A, Bronskill SE, Seow H, Junek M, Feeny D, Costa AP (2020) Associations between continuity of primary and specialty physician care and use of hospital-based care among community-dwelling older adults with complex care needs. PLoS ONE 15(6): e0234205. <https://doi.org/10.1371/journal.pone.0234205> PMID: 32559214
